# Supplementary material
Source: Research Square preprint supplement (doi:10.21203/rs.3.rs-8881137/v1)
Supplement: Supplementary file 1 [file d3810642caee718d8480bcbd.xlsx]

## Sheet: PCA Results
Supplementary materials: Principal Component Analysis (PCA) Results for Structural Layers in the Zhuguang Mountain Area (Layer 1：Kernel density, Layer 2：Line density, Layer 3：Euclidean distance)
(a) Covariance Matrix
Layer	1	2	3
1	0.00381	0.00405	-0.00118
2	0.00405	0.01271	-0.00404
3	-0.00118	-0.00404	0.00516
(b) Correlation Matrix
Layer	1	2	3
1	1	0.58208	-0.26696
2	0.58208	1	-0.49895
3	-0.26696	-0.49895	1
(c) Eigenvalues and Eigenvectors
Number of Input Layers: 3
Number of Principal Components: 3
Eigenvalues
PC	Eigenvalue
1	0.01592
2	0.0038
3	0.00216
Eigenvectors
Input Layer	PC1	PC2	PC3
1	0.32747	0.34826	-0.87834
2	0.87211	0.24629	0.4225
3	-0.36357	0.90446	0.22307
(d) Percentage and Cumulative Explained Variance
PC	Eigenvalue	Percentage (%)	Cumulative (%)
1	0.01592	73.4113	73.4113
2	0.0038	16.6166	90.0279
3	0.00216	9.9721	100

## Sheet: ROC
Supplementary Table S1. Comparative statistical metrics and predictive performance validation of the Tectonic Control Index (TCI) versus individual tectonic proxies.
ClassValue	Count	Sum_Area (Cumulative Area Proportion)	count_UD	count_UD_Area (Cumulative Mineral Occurrences)	AUC_Area
100	35	0.00012738	0	0
99	30	0.000236563	0	0	0
98	29	0.000342107	0	0	0
97	42	0.000494963	0	0	0
96	32	0.000611425	0	0	0
95	46	0.000778839	0	0	0
94	51	0.00096445	0	0	0
93	58	0.00117554	0	0	0
92	60	0.0013939	0	0	0
91	46	0.00156132	0	0	0
90	40	0.00170689	0	0	0
89	61	0.0019289	0	0	0
88	80	0.00222005	0	0	0
87	116	0.00264223	0	0	0
86	165	0.00324274	0	0	0
85	219	0.00403977	0	0	0
84	318	0.00519711	0	0	0
83	309	0.0063217	0	0	0
82	263	0.00727887	0	0	0
81	394	0.0087128	0	0	0
80	442	0.0103214	0	0	0
79	298	0.011406	0	0	0
78	411	0.0129018	0	0	0
77	438	0.0144959	1	0.0625	4.98148e-05
76	305	0.0156059	1	0.125	0.000104065
75	394	0.0170398	0	0.125	0.000179242
74	283	0.0180698	0	0.125	0.000128745
73	387	0.0194783	0	0.125	0.000176058
72	409	0.0209668	0	0.125	0.000186066
71	523	0.0228702	0	0.125	0.000237928
70	677	0.0253341	0	0.125	0.000307987
69	797	0.0282347	0	0.125	0.000362579
68	610	0.0304548	0	0.125	0.000277507
67	1044	0.0342544	0	0.125	0.000474946
66	710	0.0368384	0	0.125	0.000323
65	755	0.0395861	0	0.125	0.000343472
64	860	0.042716	1	0.1875	0.000489049
63	855	0.0458278	0	0.1875	0.000583447
62	1337	0.0506937	0	0.1875	0.000912361
61	1035	0.0544605	1	0.25	0.000823991
60	1349	0.0593701	0	0.25	0.0012274
59	1205	0.0637556	0	0.25	0.00109638
58	1399	0.0688472	0	0.25	0.00127289
57	1537	0.074441	1	0.3125	0.00157326
56	1535	0.0800275	0	0.3125	0.00174579
55	1178	0.0843148	0	0.3125	0.00133977
54	1764	0.0907347	0	0.3125	0.00200624
53	1393	0.0958045	0	0.3125	0.00158429
52	2448	0.104714	0	0.3125	0.00278417
51	2090	0.11232	0	0.3125	0.00237701
50	2247	0.120498	2	0.4375	0.00306668
49	2374	0.129138	0	0.4375	0.00378001
48	3569	0.142127	0	0.4375	0.00568275
47	4517	0.158566	0	0.4375	0.0071922
46	5316	0.177914	1	0.5	0.00906901
45	3918	0.192173	2	0.625	0.00802086
44	3781	0.205934	0	0.625	0.00860044
43	5589	0.226275	0	0.625	0.012713
42	6229	0.248945	1	0.6875	0.0148772
41	7531	0.276353	1	0.75	0.0196999
40	5405	0.296024	0	0.75	0.0147534
39	5908	0.317526	0	0.75	0.0161263
38	6548	0.341357	0	0.75	0.0178733
37	9254	0.375036	0	0.75	0.0252595
36	10681	0.413909	3	0.9375	0.0327989
35	11893	0.457193	1	1	0.0419312
34	8068	0.486556	0	1	0.029363
33	8293	0.516738	0	1	0.0301818
32	7704	0.544776	0	1	0.0280382
31	11163	0.585403	0	1	0.040627
30	10717	0.624407	0	1	0.0390038
29	10570	0.662876	0	1	0.0384688
28	7069	0.688603	0	1	0.0257272
27	6637	0.712758	0	1	0.0241549
26	9590	0.74766	0	1	0.0349022
25	9490	0.782198	0	1	0.0345382
24	9320	0.816118	0	1	0.0339195
23	6099	0.838315	0	1	0.0221969
22	6057	0.860359	0	1	0.0220441
21	5637	0.880874	0	1	0.0205155
20	6618	0.90496	0	1	0.0240858
19	3823	0.918873	0	1	0.0139136
18	5327	0.938261	0	1	0.0193873
17	3233	0.950027	0	1	0.0117663
16	3930	0.96433	0	1	0.014303
15	3029	0.975354	0	1	0.0110238
14	1446	0.980616	0	1	0.00526262
13	1866	0.987408	0	1	0.00679118
12	883	0.990621	0	1	0.00321362
11	952	0.994086	0	1	0.00346474
10	426	0.995636	0	1	0.0015504
9	431	0.997205	0	1	0.0015686
8	190	0.997896	0	1	0.000691492
7	237	0.998759	0	1	0.000862546
6	142	0.999276	0	1	0.0005168
5	61	0.999498	0	1	0.000222005
4	70	0.999753	0	1	0.00025476
3	31	0.999865	0	1	0.000112822
2	28	0.999967	0	1	0.000101904
1	9	1	0	1	3.27549e-05
Total	274768		16		0.807219
